# Supplementary material for: Reproductive resource partitioning in two sympatric Goniothalamus species (Annonaceae) from Borneo: floral biology, pollinator trapping and plant breeding system
Source: PubMed Central journal article supplement (PMC5073367; doi:10.1038/srep35674), 2016-10-21

# Reproductive resource partitioning in two sympatric *Goniothalamus* species from Borneo: floral biology, pollinator trapping and plant breeding system

Jenny Y. Y. Lau, Chun Chiu Pang, Lawrence Ramsden, Richard M.K. Saunders\*

School of Biological Sciences, The University of Hong Kong, Pokfulam Road, Hong Kong, China. Correspondence and requests for materials should be addressed to R.M.K.S. (email: saunders@hku.hk)

**Supplementary Table S1.** Putative chemical composition of floral volatile emitted by flowers of *Goniothalamus tapisoides* following exclusion of chemicals retrieved from blank controls. Phenological phases: N = non-receptive phase; P = pistillate phase; I = interim phase; S = staminate phase. Compounds arranged according to retention time (RT).

| No. | Compound name                             | Mean RT (min) | Identity likelihood |     |     |     | Percentage of total peak area |      |      |      |
|-----|-------------------------------------------|---------------|---------------------|-----|-----|-----|-------------------------------|------|------|------|
|     |                                           |               | N                   | P   | I   | S   | N                             | P    | I    | S    |
| 1   | 4-isopropenyl-1-methylcyclohexene         | 7.71          | 86                  | ... | ... | ... | 0.07                          | ...  | ...  | ...  |
| 2   | (4R)-1-methyl-4-prop-1-en-2-ylcyclohexene | 7.73          | ...                 | 94  | ... | ... | ...                           | 0.05 | ...  | ...  |
| 3   | 1,3,3-Trimethyl-2-oxabicyclo[2.2.2]octane | 8.11          | ...                 | ... | ... | 98  | ...                           | ...  | ...  | 0.38 |
| 4   | Docosane                                  | 9.17          | ...                 | ... | ... | 80  | ...                           | ...  | ...  | 0.2  |
| 5   | 2,6,11-trimethyldodecane                  | 10.02         | 90                  | 90  | 86  | <80 | 2.82                          | 0.26 | 1.13 | 1.93 |
| 6   | 1-Isopropyl-2-methylbenzene               | 10.18         | ...                 | 97  | ... | ... | ...                           | 0.14 | ...  | ...  |
| 7   | 4-Isopropylidene-1-methylcyclohexene      | 10.62         | ...                 | 94  | ... | ... | ...                           | 0.05 | ...  | ...  |
| 8   | 5-ethyl-2-methyloctane                    | 11.37         | ...                 | ... | ... | 81  | ...                           | ...  | ...  | 1.85 |

|    |                                                                                                     |       |     |     |     |     |       |       |      |      |
|----|-----------------------------------------------------------------------------------------------------|-------|-----|-----|-----|-----|-------|-------|------|------|
| 9  | 4,6,8-Trimethyl-1-nonene                                                                            | 11.98 | ... | 86  | ... | ... | ...   | 0.38  | ...  | ...  |
| 10 | 2,6,10-trimethyldodecane                                                                            | 12.17 | ... | ... | 83  | ... | ...   | ...   | 0.24 | ...  |
| 11 | 2,6,10,15-tetramethylheptadecane                                                                    | 13.71 | 91  | ... | ... | ... | 0.15  | ...   | ...  | ...  |
| 12 | 1,4-dichlorobenzene                                                                                 | 15.38 | 97  | 98  | 90  | 96  | 0.14  | 0.09  | 0.08 | 0.23 |
| 13 | 7 $\beta$ -H-Silfiperfol-5-ene                                                                      | 15.59 | ... | 90  | ... | ... | ...   | 0.07  | ...  | ...  |
| 14 | 2,6,11,15-tetramethylhexadecane                                                                     | 17.32 | ... | ... | ... | 86  | ...   | ...   | ...  | 0.25 |
| 15 | 3,7-dimethylocta-1,6-dien-3-ol                                                                      | 18.46 | ... | ... | ... | 96  | ...   | ...   | ...  | 0.59 |
| 16 | 4,6-dimethyl-6-(4-methylpent-3-enyl)bicyclo[3.1.1]hept-3-ene                                        | 18.81 | ... | ... | ... | 98  | ...   | ...   | ...  | 0.47 |
| 17 | 6,7-dimethyl-7-(4-methylpent-3-enyl)-2,3,4,5-tetrahydro-1H-tricyclo[2.2.1.0 <sup>2,6</sup> ]heptane | 18.84 | ... | ... | 98  | ... | ...   | ...   | 0.49 | ...  |
| 18 | (1S,5S,6S)-2,6-Dimethyl-6-(4-methyl-3-penten-1-yl)bicyclo[3.1.1]hept-2-ene                          | 19.21 | ... | ... | 97  | 99  | ...   | ...   | 1.33 | 1.39 |
| 19 | 4-methyl-1-propan-2-ylcyclohex-3-en-1-ol                                                            | 19.72 | ... | ... | ... | 95  | ...   | ...   | ...  | 0.39 |
| 20 | 10,10-Dimethyl-2,6-dimethylenbicyclo[7.2.0]undecane                                                 | 19.89 | ... | 98  | ... | ... | ...   | 0.41  | ...  | ...  |
| 21 | 2-(2-ethoxyethoxy)ethanol                                                                           | 20.22 | ... | ... | 86  | 80  | ...   | ...   | 0.2  | 0.16 |
| 22 | (4R,4aS,6R)-6-Isopropenyl-4,4a-dimethyl-1,2,3,4,4a,5,6,7-octahydronaphthalene                       | 20.74 | ... | 83  | ... | ... | ...   | 0.59  | ...  | ...  |
| 23 | 2-Isopropenyl-4a,8-dimethyl-1,2,3,4,4a,5,6,7-octahydronaphthalene                                   | 21.37 | 97  | ... | ... | ... | 0.76  | ...   | ...  | ...  |
| 24 | 5,8a-dimethyl-3-propan-2-ylidene-1,2,4,4a,7,8-hexahydronaphthalene                                  | 22.12 | 93  | 91  | ... | ... | 12.64 | 23.92 | ...  | ...  |
| 25 | (3S,8aS)-5,8a-dimethyl-3-prop-1-en-2-yl-2,3,4,4a,7,8-hexahydro-1H-naphthalene                       | 22.48 | 96  | ... | ... | ... | 0.73  | ...   | ...  | ...  |
| 26 | Naphthalene                                                                                         | 22.76 | 95  | ... | ... | ... | 9.26  | ...   | ...  | ...  |
| 27 | (8aS)-8a-methyl-5-methylidene-3-prop-1-en-2-yl-1,2,3,4,4a,8-hexahydronaphthalene                    | 23.01 | ... | 91  | ... | ... | ...   | 7.87  | ...  | ...  |
| 28 | Methyl (Z)-N-hydroxybenzenecarboximidate                                                            | 23.68 | 87  | 90  | <80 | 90  | 1.09  | 0.47  | 0.41 | 1.22 |

|    |                                                                      |       |     |     |     |     |      |      |      |      |
|----|----------------------------------------------------------------------|-------|-----|-----|-----|-----|------|------|------|------|
| 29 | 5,8a-dimethyl-3-prop-1-en-2-yl-2,3,7,8-tetrahydro-1H-naphthalene     | 24.23 | 95  | 99  | ... | ... | 0.43 | 3.55 | ...  | ...  |
| 30 | Propan-2-yl dodecanoate                                              | 25.06 | 99  | ... | ... | <80 | 0.15 | ...  | ...  | 0.17 |
| 31 | Bicyclo[4.4.1]undeca-1,3,5,7,9-pentaene                              | 25.19 | 93  | ... | ... | ... | 0.07 | ...  | ...  | ...  |
| 32 | Phenylmethanol                                                       | 25.94 | ... | 98  | ... | ... | ...  | 0.53 | ...  | ...  |
| 33 | 1,3-dimethylnaphthalene                                              | 28.24 | 91  | ... | ... | ... | 0.05 | ...  | ...  | ...  |
| 34 | 1,7-dimethylnaphthalene                                              | 28.25 | ... | ... | ... | 94  | ...  | ...  | ...  | 0.05 |
| 35 | Phenol                                                               | 28.54 | 94  | 93  | 90  | 94  | 0.37 | 0.18 | 0.18 | 0.34 |
| 36 | 2-phenoxyethanol                                                     | 31.18 | 93  | ... | ... | 87  | 0.13 | ...  | ...  | 0.13 |
| 37 | Ethyl 4-ethoxybenzoate                                               | 31.63 | 98  | ... | 94  | 98  | ...  | 0.25 | 0.18 | 0.31 |
| 38 | Hexadecanoic acid                                                    | 32.58 | ... | ... | <80 | 94  | ...  | ...  | 0.1  | 0.11 |
| 39 | Dimethyl benzene-1,2-dicarboxylate                                   | 33.95 | 93  | ... | ... | 91  | 0.13 | ...  | ...  | 0.09 |
| 40 | 2,4-ditert-butylphenol                                               | 34.35 | ... | 95  | ... | ... | ...  | 2.07 | ...  | ...  |
| 41 | 1,4a-dimethyl-7-prop-1-en-2-yl-3,4,5,6,7,8-hexahydronaphthalen-2-one | 34.8  | 99  | 99  | ... | ... | 0.68 | 0.82 | ...  | ...  |

**Supplementary Table S2.** Putative chemical composition of floral volatile emitted by flowers of *Goniothalamus suaveolens* following exclusion of chemicals retrieved from blank controls. Phenological phases: N = non-receptive phase; P = pistillate phase; I = interim phase; S = staminate phase. Compounds arranged according to retention time (RT).

| No. | Compound name                                                           | Mean RT (min) | Identity likelihood |     |     |     | Percentage of total peak area |      |      |      |
|-----|-------------------------------------------------------------------------|---------------|---------------------|-----|-----|-----|-------------------------------|------|------|------|
|     |                                                                         |               | N                   | P   | I   | S   | N                             | P    | I    | S    |
| 1   | 3-methylbutyl acetate                                                   | 5.19          | ...                 | 90  | ... | ... | ...                           | 1.65 | ...  | ...  |
| 2   | 4-methyl-1-propan-2-ylbicyclo[3.1.0]hex-2-ene                           | 6.57          | ...                 | ... | 80  | ... | ...                           | ...  | 0.11 | ...  |
| 3   | Nonane                                                                  | 8.85          | ...                 | 83  | ... | ... | ...                           | 0.06 | ...  | ...  |
| 4   | Ethyl hexanoate                                                         | 9.15          | ...                 | 93  | ... | ... | ...                           | 0.14 | ...  | ...  |
| 5   | 2,6,11-trimethyldodecane                                                | 9.84          | ...                 | 81  | 83  | <80 | ...                           | 0.62 | 2.3  | 0.33 |
| 6   | 1,4-dichlorobenzene                                                     | 15.41         | ...                 | 94  | 96  | ... | ...                           | 0.06 | 0.07 | ...  |
| 7   | 2-bromododecane                                                         | 16.63         | ...                 | 90  | ... | ... | ...                           | 0.28 | ...  | ...  |
| 8   | (1S,5S,6R)-4,6-dimethyl-6-(4-methylpent-3-enyl)bicyclo[3.1.1]hept-3-ene | 19.22         | ...                 | 93  | ... | ... | ...                           | 0.08 | ...  | ...  |
| 9   | Hexadecane                                                              | 19.7          | ...                 | ... | 96  | 86  | ...                           | ...  | 0.46 | 0.16 |
| 10  | 2-(2-ethoxyethoxy)ethanol                                               | 20.23         | ...                 | ... | <80 | 90  | ...                           | ...  | 0.33 | 0.2  |
| 11  | 2,6,10,15-Tetramethylheptadecane                                        | 21.24         | ...                 | 80  | <80 | ... | ...                           | 0.12 | 0.32 | ...  |
| 12  | 2,6,10-trimethyltetradecane                                             | 21.32         | ...                 | ... | 90  | ... | ...                           | ...  | 0.32 | ...  |
| 13  | [(2E)-3,7-dimethylocta-2,6-dienyl] acetate                              | 23.35         | ...                 | 91  | ... | ... | ...                           | 0.58 | ...  | ...  |
| 14  | Methyl (Z)-N-hydroxybenzenecarboximidate                                | 23.68         | ...                 | 87  | ... | <80 | ...                           | 0.89 | ...  | 0.52 |
| 15  | 2-phenylethyl acetate                                                   | 24.58         | ...                 | 90  | ... | ... | ...                           | 0.3  | ...  | ...  |
| 16  | 2,6,10,14-Tetramethylhexadecane                                         | 24.96         | ...                 | ... | 83  | ... | ...                           | ...  | 0.26 | ...  |
| 17  | Bicyclo[4.4.1]undeca-1,3,5,7,9-pentaene                                 | 25.06         | ...                 | 97  | ... | ... | ...                           | 0.17 | ...  | ...  |

|    |                                                    |       |     |     |     |     |      |      |      |      |
|----|----------------------------------------------------|-------|-----|-----|-----|-----|------|------|------|------|
| 18 | Propan-2-yl dodecanoate                            | 25.09 | ... | ... | 99  | 87  | ...  | ...  | 3.41 | 0.23 |
| 19 | 1-methylnaphthalene                                | 25.19 | ... | 94  | ... | ... | ...  | 0.09 | ...  | ...  |
| 20 | (2E)-3,7-dimethylocta-2,6-dien-1-ol                | 25.4  | ... | 96  | ... | ... | ...  | 0.28 | ...  | ...  |
| 21 | 2-phenylethanol                                    | 26.66 | ... | 93  | ... | ... | ...  | 0.18 | ...  | ...  |
| 22 | 1,7-dimethylnaphthalene                            | 28.27 | ... | ... | 97  | ... | ...  | ...  | 0.18 | ...  |
| 23 | Phenol                                             | 28.55 | ... | 94  | ... | 91  | ...  | 0.33 | ...  | 0.25 |
| 24 | Tetratetracontane                                  | 29.97 | 95  | ... | ... | ... | 0.53 | ...  | ...  | ...  |
| 25 | 2-nitroethylbenzene                                | 30.63 | ... | ... | ... | 96  | ...  | ...  | ...  | 1.55 |
| 26 | 2-phenoxyethanol                                   | 31.19 | ... | 87  | ... | 87  | ...  | 0.33 | ...  | 0.09 |
| 27 | Ethyl 4-ethoxybenzoate                             | 31.64 | ... | 93  | 98  | 96  | ...  | 0.4  | 1.54 | 0.3  |
| 28 | Hexadecanoic acid                                  | 32.9  | ... | 96  | 97  | 94  | ...  | 0.28 | 0.17 | 0.08 |
| 29 | Hexadecan-1-ol                                     | 33.02 | 95  | ... | ... | ... | 1.64 | ...  | ...  | ...  |
| 30 | Dimethyl benzene-1,2-dicarboxylate                 | 33.97 | ... | 90  | 94  | 95  | ...  | 0.16 | 0.13 | 0.22 |
| 31 | Methyl octyl phthalate                             | 35.07 | 90  | ... | ... | ... | 0.46 | ...  | ...  | ...  |
| 32 | Octadec-1-ene                                      | 35.22 | 96  | ... | ... | ... | 0.5  | ...  | ...  | ...  |
| 33 | 1-hexacosene                                       | 36.01 | 93  | ... | ... | ... | 0.43 | ...  | ...  | ...  |
| 34 | Diphenylmethanone                                  | 37.01 | ... | ... | 87  | ... | ...  | ...  | 0.11 | ...  |
| 35 | 3,5-ditert-butyl-4-hydroxybenzaldehyde             | 37.27 | ... | ... | 94  | ... | ...  | ...  | 0.14 | ...  |
| 36 | 1-O-butyl 2-O-tetradecyl benzene-1,2-dicarboxylate | 38.08 | ... | ... | 81  | ... | ...  | ...  | 0.42 | ...  |
| 37 | Octadecan-1-ol                                     | 38.32 | 95  | ... | ... | ... | 2.48 | ...  | ...  | ...  |
| 38 | 2-octyldodecan-1-ol                                | 39.51 | 98  | ... | ... | ... | 0.81 | ...  | ...  | ...  |

**Supplementary Fig. S1** Pollinators of *Goniothalamus tapisoides* and *G. suaveolens*. a, *Endaeus* sp. 1; b, *Endaeus* sp. 2; c, pollen grains of *G. tapisoides* deposited on *Endaeus* sp. 2; d, *Endaeus* sp. 3; e, cf. *Carpophilus* sp.; f, cf. *Endaeus* sp. ; g, *Carpophilus* cf. *marginellus* Motschulsky; h, *Carpophilus* (*Ecnomorphus*) cf. *dilutus* Motschulsky. (Background artificially darkened using Photoshop graphics software).

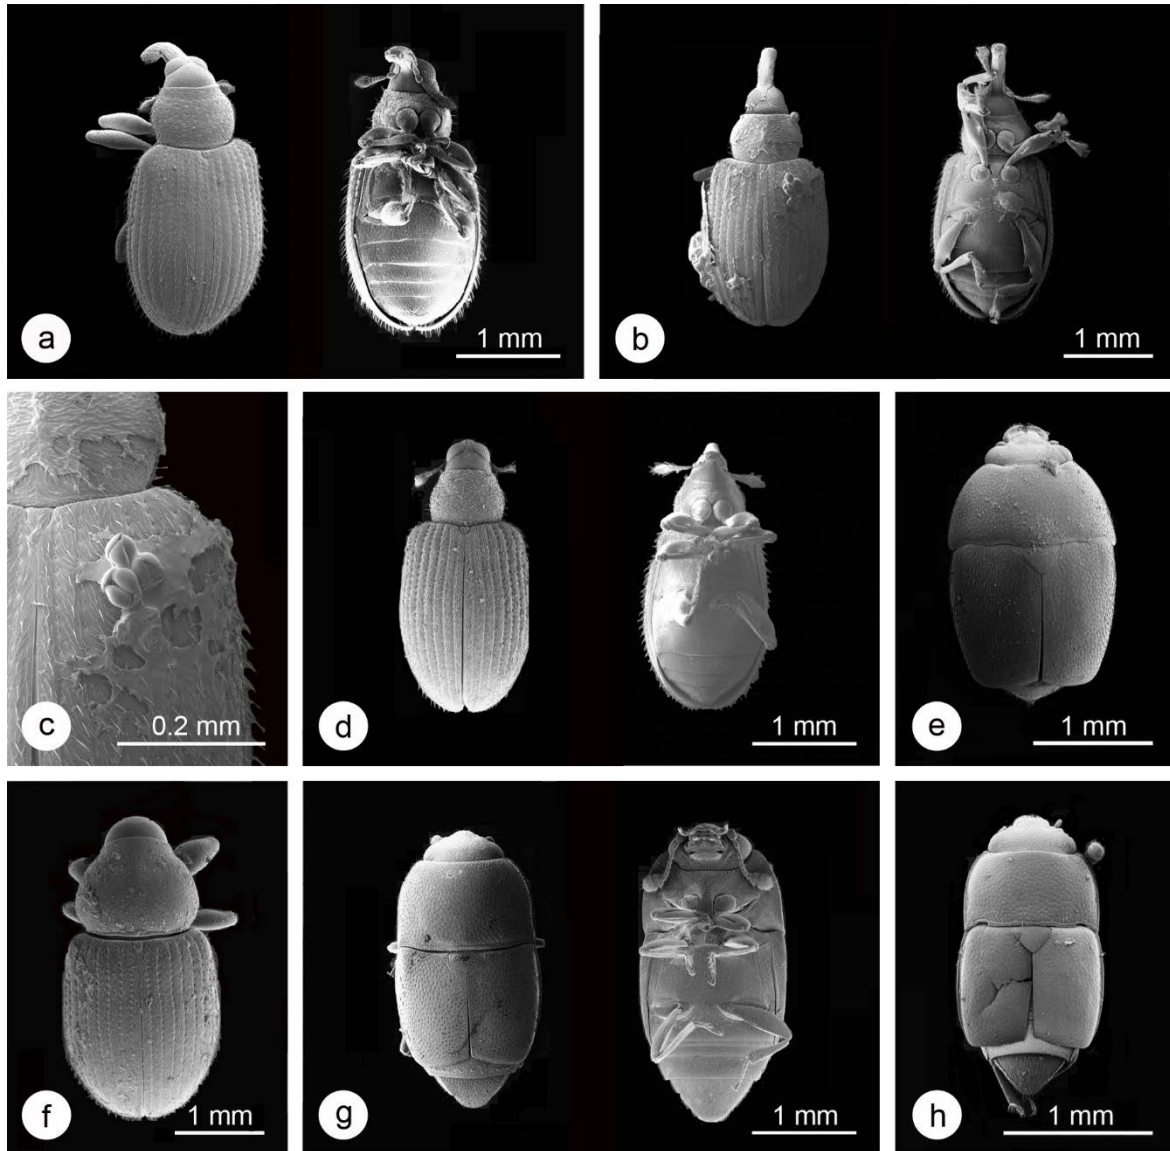

Supplement: srep35674-s1.pdf [file srep35674-s1.pdf]
